# Supplementary material for: Hydrogen evolution reaction activity of nickel phosphide is highly sensitive to electrolyte pH
Source: Royal Society of Chemistry journal article supplement (doi:10.1039/c7ta06000a), 2017-01-01
Supplement: c7ta06000a1.pdf [file c7ta06000a1.pdf]

## Electronic Supplementary Information

### Hydrogen evolution reaction activity of nickel phosphide is highly sensitive to electrolyte pH

Zheng Zhou,<sup>a</sup> Li Wei,\*<sup>a</sup> Yanqing Wang,<sup>b</sup> H. Enis Karahan,<sup>c</sup> Zibin Chen,<sup>d</sup> Yaojie Lei,<sup>a</sup> Xuncai Chen,<sup>a</sup> Shengli Zhai,<sup>a,c</sup> Xiaozhou Liao,<sup>d</sup> Yuan Chen\*<sup>a</sup>

<sup>a</sup>The University of Sydney, School of Chemical and Biomolecular Engineering, Sydney, New South Wales, 2006, Australia E-mail: l.wei@sydney.edu.au; yuan.chen@sydney.edu.au

<sup>b</sup>The University of Tokyo, Faculty of Engineering, Yayoi, Bunkyo-ku, Tokyo, 113-0032 Japan

<sup>c</sup>Nanyang Technological University, School of Chemical and Biomedical Engineering, 637459, Singapore

<sup>d</sup>The University of Sydney, School of Aerospace, Mechanical & Mechatronic Engineering, Sydney, New South Wales, 2006, Australia

### Preparation of Ni<sub>2</sub>P electrodes

Ti foils (Sigma-Aldrich, 99.7%, 3 cm in length, 0.5 cm in width and 0.13 mm in thickness) were first cleaned by sonication in acetone and isopropanol solutions for 10 min, respectively. Next, Ni films were electrodeposited on the cleaned Ti foils in 1 M NiSO<sub>4</sub> electrolyte (pH adjusted to 2 using 1 M H<sub>2</sub>SO<sub>4</sub>) using an electrochemical workstation (CHI, 660D). The Ti foils were immersed in the electrolyte about 1 cm in depth. Carbon rods (99.999%, Strem Chemicals) as the counter electrode and a saturated calomel electrode (SCE) (in saturated KCl) were used as the counter and reference electrode, respectively. Chronoamperometry was applied at the cathodic current density of 10 mA·cm<sup>-2</sup> for 900 s. Subsequently, Ni oxide layers were formed by dipping the Ni films in 0.1 M KOH solution under the potential of 1.1 V (vs. RHE) for 900 s. Afterwards, the Ni oxide layers were phosphorized to produce Ni<sub>2</sub>P catalysts in a tube furnace. About 1.4 g of NaH<sub>2</sub>PO<sub>2</sub> (Sigma-Aldrich) was loaded in a ceramic boat and placed at the upstream in the tube furnace to generate PH<sub>3</sub>. Ti foils with Ni oxide layers were placed at the downstream approximately 5 cm away from NaH<sub>2</sub>PO<sub>2</sub>. The tube furnace was first purged with Ar (50 sscm) for 30 min, and then heated at 5 °C min<sup>-1</sup> to 280 °C and held at the temperature for 1 h. After phosphorization, the furnace was cooled to room temperature under flowing Ar.

### Preparation of electrolytes at different pH

Following the procedure developed in a previous study,<sup>1</sup> 19 electrolytes in the range from 0.52 to 13.53 were prepared. Among them, 11 electrolytes were pH-buffered from 2.71 to 10.46. First, sulphuric acid (H<sub>2</sub>SO<sub>4</sub>, 0.5 and 0.1 M), phosphoric acid (H<sub>3</sub>PO<sub>4</sub>, 0.1 M), acetate acid (CH<sub>3</sub>COOH, 1 M and 0.3 M) and potassium hydroxide (KOH; 3.7 M, 1 M and 0.1 M) electrolytes were prepared by adding H<sub>2</sub>SO<sub>4</sub> (Sigma-Aldrich, 98 wt%), H<sub>3</sub>PO<sub>4</sub> (Sigma-Aldrich, 85 wt%), CH<sub>3</sub>COOH (Sigma-Aldrich, ≥99 wt%) and KOH pellet (Sigma-Aldrich) into deionised (DI) water, respectively. Sodium acetate solution (CH<sub>3</sub>COONa; 0.2M), sodium carbonate solution (Na<sub>2</sub>CO<sub>3</sub>, 0.2 M) and sodium bicarbonate solution (NaHCO<sub>3</sub>, 0.2 M) were prepared by adding CH<sub>3</sub>COONa (Sigma-Aldrich, ≥99 wt%), Na<sub>2</sub>CO<sub>3</sub> (Sigma-Aldrich, ≥99 wt%) and NaHCO<sub>3</sub> (Sigma-Aldrich, ≥99 wt%) into DI water, respectively. Acetate buffer was prepared by

mixing different ratio of 0.3 M (or 1 M for pH < 3) CH<sub>3</sub>COOH and 0.2 M CH<sub>3</sub>COONa solutions; phosphoric buffer was prepared by adding different amount of 3.7 M KOH into 0.2 M H<sub>3</sub>PO<sub>4</sub> solution; (bi)carbonate buffer was prepared by mixing different ratios of 0.2 M Na<sub>2</sub>CO<sub>3</sub> and 0.2 M NaHCO<sub>3</sub> solutions.

**Table S1.** Composition of electrolytes at different pH

| Electrolytes                   | pH    | Composition                                                                          |
|--------------------------------|-------|--------------------------------------------------------------------------------------|
| H <sub>2</sub> SO <sub>4</sub> | 0.52  | 0.5 M H <sub>2</sub> SO <sub>4</sub>                                                 |
| H <sub>2</sub> SO <sub>4</sub> | 1.10  | 0.1 M H <sub>2</sub> SO <sub>4</sub>                                                 |
| H <sub>3</sub> PO <sub>4</sub> | 1.68  | 0.1 M H <sub>3</sub> PO <sub>4</sub>                                                 |
| H <sub>3</sub> PO <sub>4</sub> | 2.81  | 0.1 M H <sub>3</sub> PO <sub>4</sub> diluted                                         |
| acetate buffer solution        | 2.71  | 1 M CH <sub>3</sub> COOH (48.0 mL) + 0.2 M CH <sub>3</sub> COONa (2.0 mL)            |
| acetate buffer solution        | 3.54  | 0.3 M CH <sub>3</sub> COOH (40.0 mL) + 0.2 M CH <sub>3</sub> COONa (10.0 mL)         |
| acetate buffer solution        | 4.48  | 0.3 M CH <sub>3</sub> COOH (25.0 mL) + 0.2 M CH <sub>3</sub> COONa (25.0 mL)         |
| acetate buffer solution        | 5.39  | 0.3 M CH <sub>3</sub> COOH (10.0 mL) + 0.2 M CH <sub>3</sub> COONa (40.0 mL)         |
| phosphoric buffer solution     | 5.40  | 0.2 M H <sub>3</sub> PO <sub>4</sub> (40.0 mL) + 3.7 M KOH (2.7 mL)                  |
| phosphoric buffer solution     | 6.15  | 0.2 M H <sub>3</sub> PO <sub>4</sub> (40.0 mL) + 3.7 M KOH (3.4 mL)                  |
| phosphoric buffer solution     | 7.21  | 0.2 M H <sub>3</sub> PO <sub>4</sub> (40.0 mL) + 3.7 M KOH (4.6 mL)                  |
| phosphoric buffer solution     | 8.28  | 0.2 M H <sub>3</sub> PO <sub>4</sub> (40.0 mL) + 3.7 M KOH (5.0 mL)                  |
| (bi)carbonate buffer solution  | 8.26  | 0.2 M NaHCO <sub>3</sub> (49.0 mL) + 0.2 M Na <sub>2</sub> CO <sub>3</sub> (1.0 mL)  |
| (bi)carbonate buffer solution  | 9.28  | 0.2 M NaHCO <sub>3</sub> (35.0 mL) + 0.2 M Na <sub>2</sub> CO <sub>3</sub> (15.0 mL) |
| (bi)carbonate buffer solution  | 10.46 | 0.2 M NaHCO <sub>3</sub> (5.0 mL) + 0.2 M Na <sub>2</sub> CO <sub>3</sub> (45.0 mL)  |
| KOH                            | 10.41 | 0.1 M KOH diluted                                                                    |
| KOH                            | 11.33 | 0.1 M KOH diluted                                                                    |
| KOH                            | 12.42 | 0.1 M KOH                                                                            |
| KOH                            | 13.53 | 1 M KOH                                                                              |

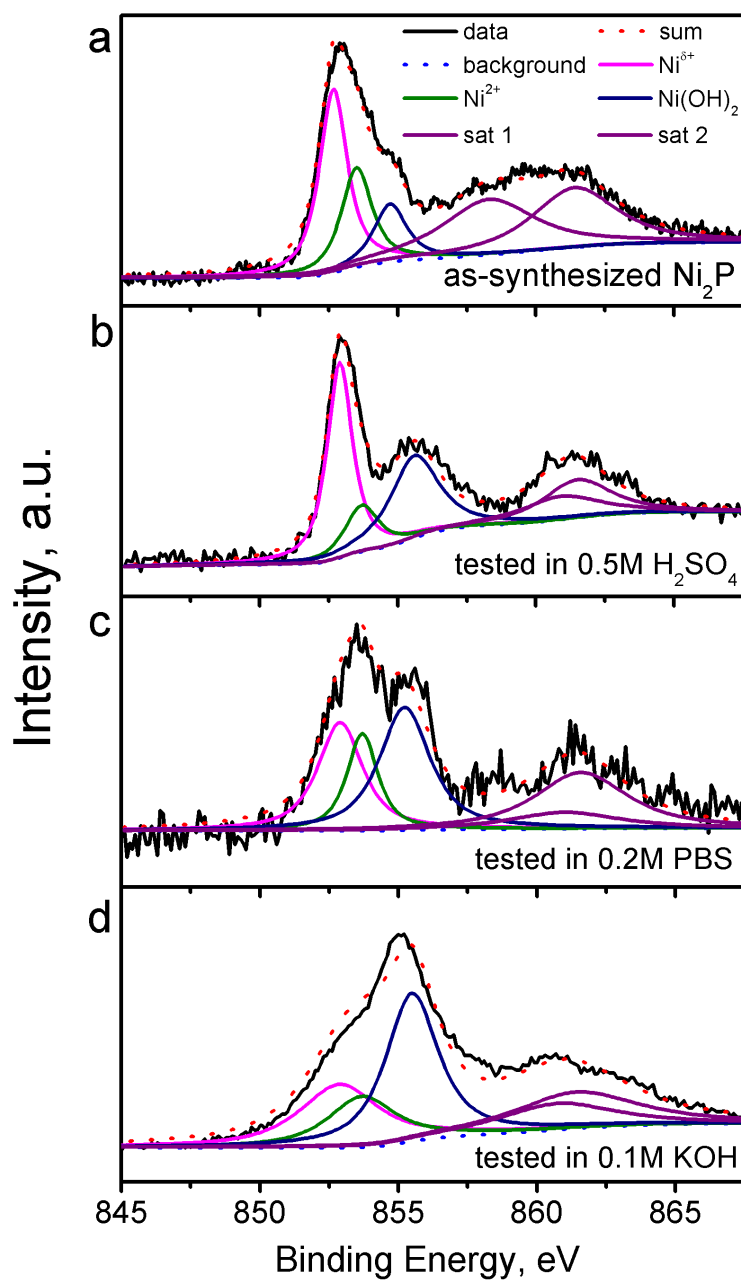

**Fig. S1.** High-resolution XPS spectra of  $\text{Ni}_2\text{P}$  electrodes (a) as synthesized, and (b-d) after HER tests in different electrolytes. (b) 0.5 M  $\text{H}_2\text{SO}_4$ , (c) 0.2 M phosphoric buffer, and (d) 0.1 M KOH.

**Table S2.** Surface composition of Ni<sub>2</sub>P electrodes at different conditions: as synthesized and after HER test in different electrolytes. The ratio is calculated from the XPS peak area determined in Fig. S1.

| Sample                         | Ratio (at. %)    |                  |                     |
|--------------------------------|------------------|------------------|---------------------|
|                                | Ni <sup>δ+</sup> | Ni <sup>2+</sup> | Ni(OH) <sub>2</sub> |
| As-synthesized                 | 51.5             | 30.1             | 18.4                |
| H <sub>2</sub> SO <sub>4</sub> | 40.2             | 24.2             | 35.6                |
| PBS                            | 34.5             | 21.4             | 44.1                |
| KOH                            | 29.8             | 25.0             | 45.2                |

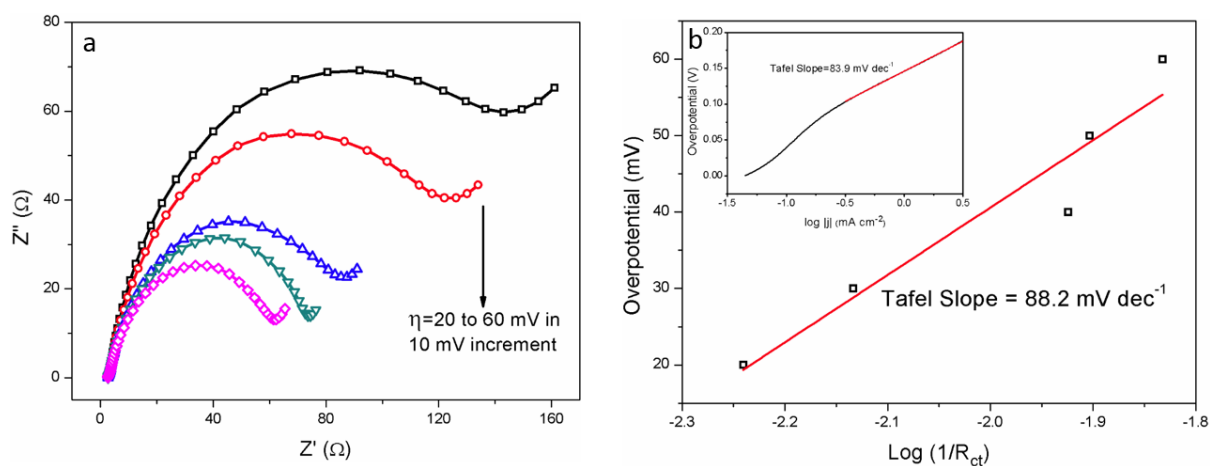

**Fig. S2.** (a) Nyquist plot and fitting results of the impedance response of the Ni<sub>2</sub>P electrode, (b) Plot of  $\log(R_{ct}^{-1})$  vs.  $\eta$  for the Ni<sub>2</sub>P electrode. The insert is the Tafel plot obtained from the polarization curve. All measurements were performed in 0.5 M H<sub>2</sub>SO<sub>4</sub>.

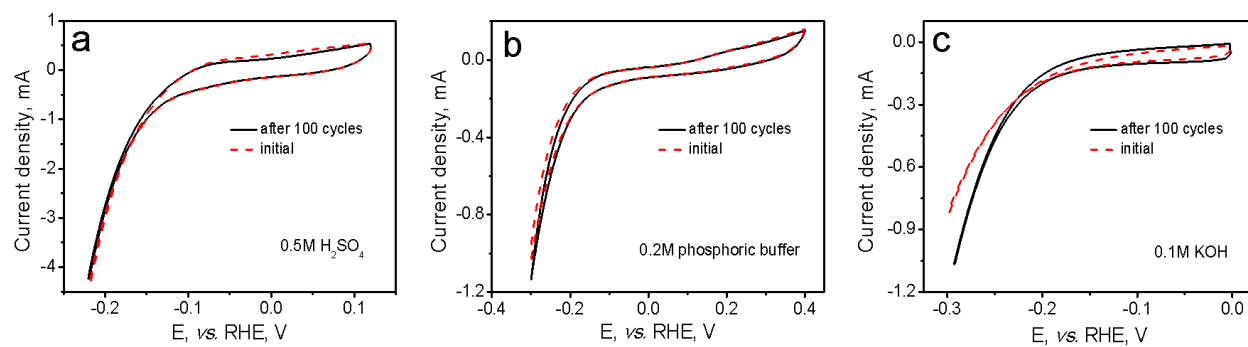

**Fig. S3.** CV curves of  $\text{Ni}_2\text{P}$ : (a) in 0.5 M  $\text{H}_2\text{SO}_4$ , (b) in 0.2 M phosphoric buffer, (c) in 0.1 M KOH.

**Table S3.** EDS element ratio before/after tested in 0.1 M KOH.

| Sample | Ratio (%) |      |      |     |
|--------|-----------|------|------|-----|
|        | Ni        | P    | O    | Ti  |
| Before | 60.0      | 25.1 | 14.1 | 0.8 |
| After  | 76.7      | 13.3 | 8.3  | 1.7 |

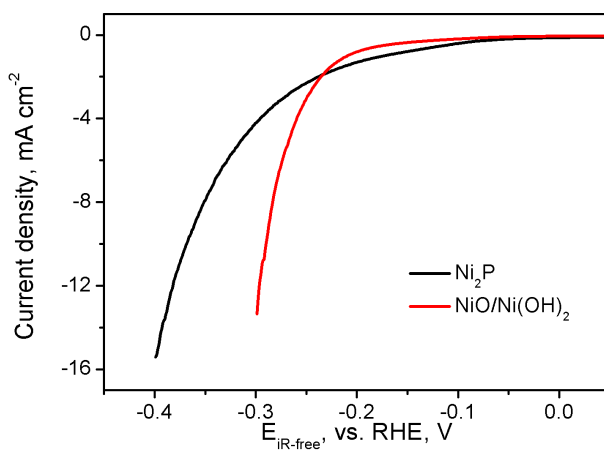

**Fig. S4.** Polarization curves of  $\text{Ni}_2\text{P}$  and  $\text{NiO/Ni(OH)}_2$  electrodes in 0.1 M KOH electrolytes after 100 CV cycles.

## ECSA of Ni<sub>2</sub>P catalysts

Electrochemical active surface area (ECSA) of Ni<sub>2</sub>P catalysts was estimated from their electric double layer capacitance ( $C_{dl}$ ). Cyclic voltammetry (CV) scans of Ni<sub>2</sub>P electrodes were recorded in a non-Faradic region (-0.035–0.035 V vs. reversible hydrogen electrode (RHE)) at the different scan rates (10, 20, 30, 40 and 50 mV s<sup>-1</sup>) in 0.5 M H<sub>2</sub>SO<sub>4</sub>. Their anodic and cathodic current densities measured at the middle potential from CV scans were linearly fitted with the CV scan rates to obtain Slope<sub>anodic</sub> and Slope<sub>cathodic</sub>, respectively.<sup>2</sup>  $C_{dl}$  was calculated by the equation (1):

$$C_{dl} = (\text{Slope}_{\text{anodic}} - \text{Slope}_{\text{cathodic}})/2 \quad (1)$$

ECSA was then calculated by dividing the  $C_{dl}$  using the specific surface capacitance ( $C_s$ ) of the electrode surface:

$$\text{ECSA} = C_{dl} / C_s \quad (2)$$

Since the exact value of  $C_s$  for Ni<sub>2</sub>P is not available, A commonly used  $C_s$  value (0.035 mF cm<sup>-2</sup>) for metal surfaces was used in this study.<sup>3-5</sup>

$C_{dl}$  of Ni<sub>2</sub>P electrodes is ~0.285 mF, corresponding to the ECSA of 8.13 cm<sup>2</sup> for the electrode with the GSA of 0.5 cm<sup>2</sup>. The much larger ECSA compared to GSA can be attributed to the rough surface of Ni<sub>2</sub>P particles as shown in SEM images (Fig. 1b).

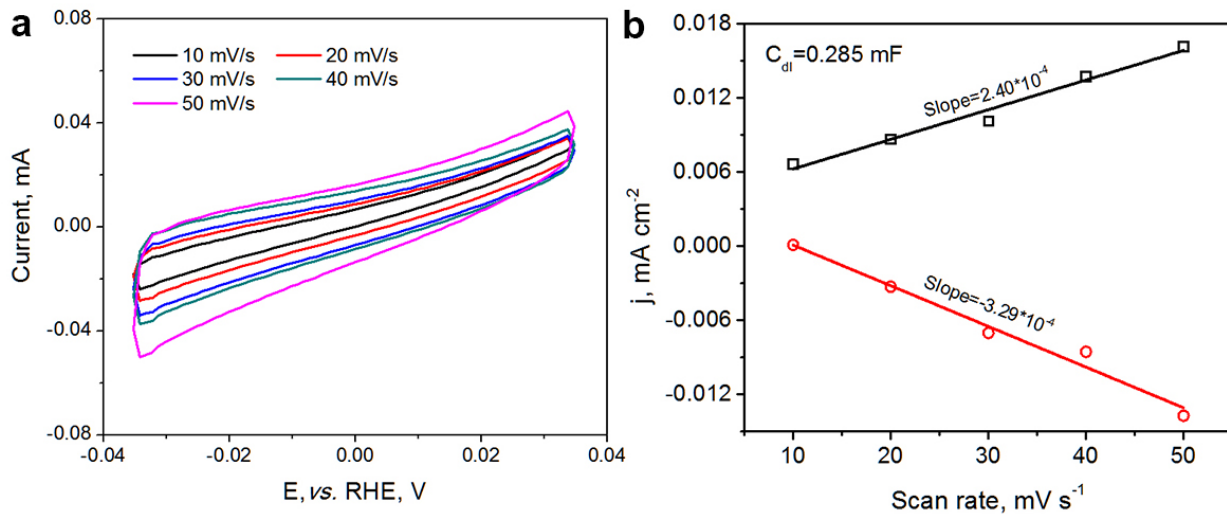

**Fig. S5.** (a) CV curves of the Ni<sub>2</sub>P electrode at a non-faradic area in 0.5 M H<sub>2</sub>SO<sub>4</sub> at the scan rates of 10, 20, 30, 40 and 50 mV s<sup>-1</sup>. (b) Capacitive currents plotted as a function of the scan rate.

### ECSA of Pt foil

ECSA of the Pt foil was determined from its CV curve in 0.5 M H<sub>2</sub>SO<sub>4</sub> electrolyte at the scan rate of 50 mV s<sup>-1</sup>. Three regions of current-potential response are included in the range from 0 to 1.6 V as shown in Fig. S7. First, the electro-adsorption and desorption of H<sub>2</sub> is located between 0.05 and 0.4 V with two redox peaks corresponding to strong and weak binding of H<sub>2</sub> at Pt (100) and (110) surfaces. Second, the double layer region has a constant current from 0.4 to 0.75 V. Third, an oxidation peak appears at E > 0.85 V in the positive-going scan and a reduced peak is observed around 0.8 V in the following negative-going scan. The redox peaks are caused by the formation and reduction of hydroxide/oxide on Pt. The amounts of charge exchanged during the electro-adsorption ( $Q'$ ) and desorption ( $Q''$ ) of H<sub>2</sub> on Pt can be calculated using following equation:

$$Q = \frac{1}{v} \int_{E1}^{E2} I dE$$



where  $v$  is the scan rate. The blue region in Fig. S7 contributed by the capacitive current from the double layer capacitance is deducted from the total charge. The coulombic charge of  $H_2$  desorption ( $Q_H$ ) on Pt foil can be calculated from the equation:

$$Q_H = \frac{1}{2}(Q' + Q'')$$

ECSA of Pt foil was then calculated by the equation:

$$\text{ECSA} = \frac{Q_H}{0.21}$$

where the constant ( $0.21 \text{ mC cm}^{-2}$ ) represents the charge required to oxidize a monolayer of  $H_2$  on Pt.<sup>6</sup> The charges  $Q_H$ ,  $Q'$ ,  $Q''$  and ECSA of Pt foil were summarized in Table S3.

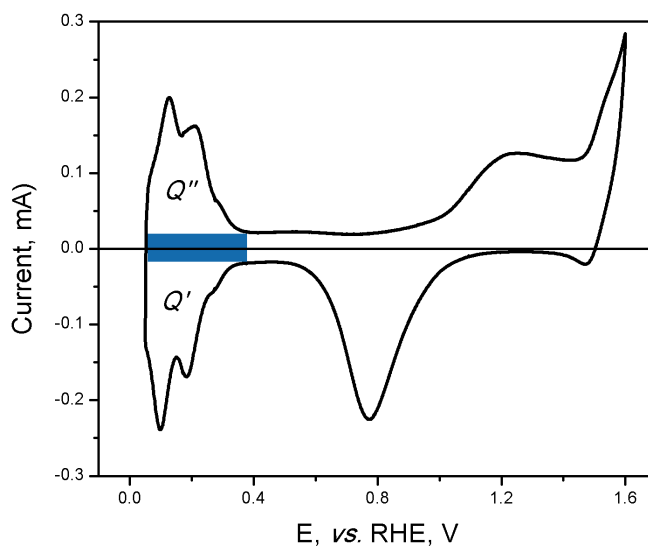

**Fig. S6.** ECSA calculation of Pt foil in 0.5 M  $H_2SO_4$ . The CV scan rate is  $50 \text{ mV s}^{-1}$ .

**Table S4.**  $Q_H$ ,  $Q'$ ,  $Q''$  and ECSA of Pt foil ( $2 \text{ cm}^2$ )

| Catalyst | $Q'$ (mC) | $Q''$ (mC) | $Q_H$ (mC) | ECSA ( $\text{cm}^2$ ) |
|----------|-----------|------------|------------|------------------------|
| Pt foil  | 0.56      | 0.60       | 0.58       | 2.76                   |

## References cited in ESI:

1. W. Sheng, Z. Zhuang, M. Gao, J. Zheng, J. G. Chen and Y. Yan, *Nat. Commun.*, 2015, **6**, 5848.
2. Y. Yang, H. Fei, G. Ruan, C. Xiang and J. M. Tour, *ACS Nano*, 2014, **8**, 9518-9523.
3. B. Seo, D. S. Baek, Y. J. Sa and S. H. Joo, *CrystEngComm*, 2016, **18**, 6083-6089.
4. C. C. McCrory, S. Jung, J. C. Peters and T. F. Jaramillo, *J. Am. Chem. Soc.*, 2013, **135**, 16977-16987.
5. C. C. McCrory, S. Jung, I. M. Ferrer, S. M. Chatman, J. C. Peters and T. F. Jaramillo, *J. Am. Chem. Soc.*, 2015, **137**, 4347-4357.
6. A. Pozio, M. De Francesco, A. Cemmi, F. Cardellini and L. Giorgi, *J. Power Sources*, 2002, **105**, 13-19.
